# Supplementary material
Source: publisher figshare collection journal article supplement (https://acs.figshare.com/ndownloader/files/3797626)
Supplement: Supplementary file 1 [file 3797626]

## Supporting Information

# Integrated Fast Assembly of Free-Standing Lithium Titanate/Carbon Nanotube/Cellulose Nanofiber Hybrid Network Film as Flexible Paper-Electrode for Lithium-ion Batteries

*Shaomei Cao<sup>†</sup>, Xin Feng<sup>\*,†</sup>, Yuanyuan Song<sup>‡</sup>, Xin Xue<sup>†</sup>, Hongjiang Liu<sup>‡</sup>, Miao Miao<sup>†</sup>, Jianhui Fang<sup>‡</sup>, Liyi Shi<sup>†,‡</sup>*

<sup>†</sup> Research Center of Nano Science and Technology, Shanghai University, Shanghai 200444, P. R. China

<sup>‡</sup> Department of Chemistry, College of Science, Shanghai University, Shanghai 200444, P. R. China

<sup>‡</sup> School of Materials Sciences and Engineering, Shanghai University, Shanghai 200444, P. R. China.

\*Corresponding Author:

\*E-mail: [fengxin@shu.edu.cn](mailto:fengxin@shu.edu.cn) (X. Feng).

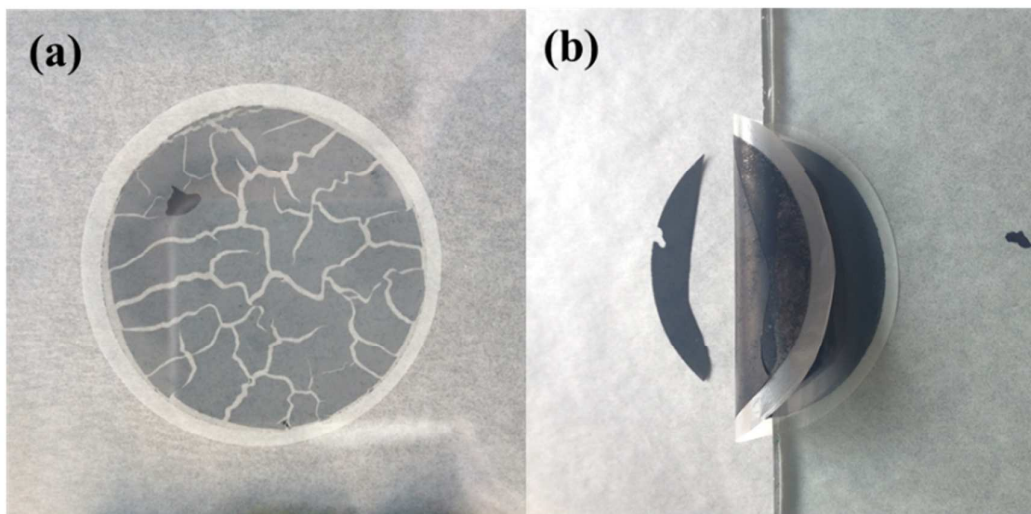

**Figure S1.** (a) Photograph of LTO/CNT/CNF film with LTO percentage of 80%; (b) Photograph of LTO/CNT film on a PC membrane.

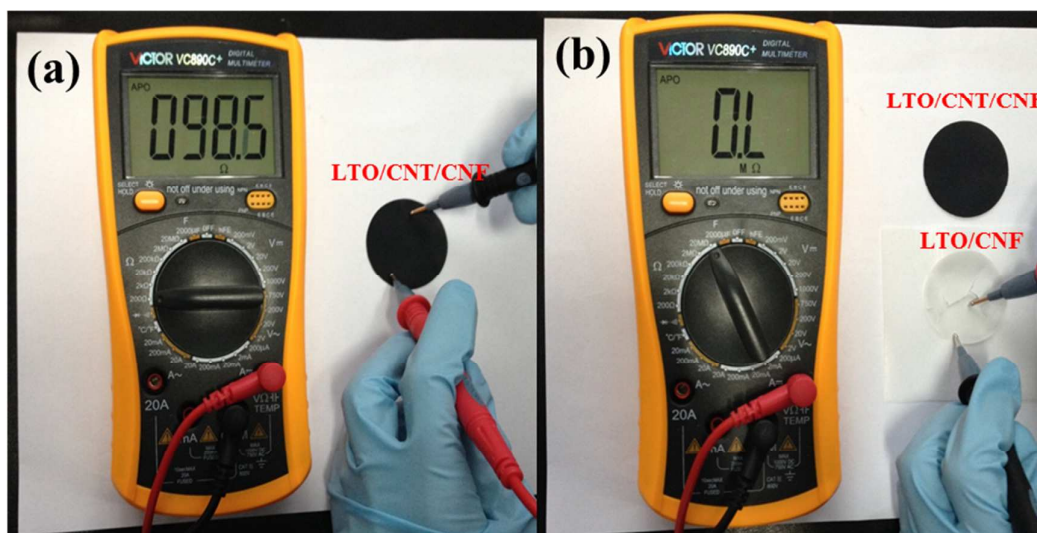

**Figure S2.** Resistance test of (a) LTO/CNT/CNF film and (b) LTO/CNF film using an ohmmeter. The ohmic resistance of LTO/CNF film is too large to be tested, while the resistance of LTO/CNT/CNF film is 98.5  $\Omega$ .

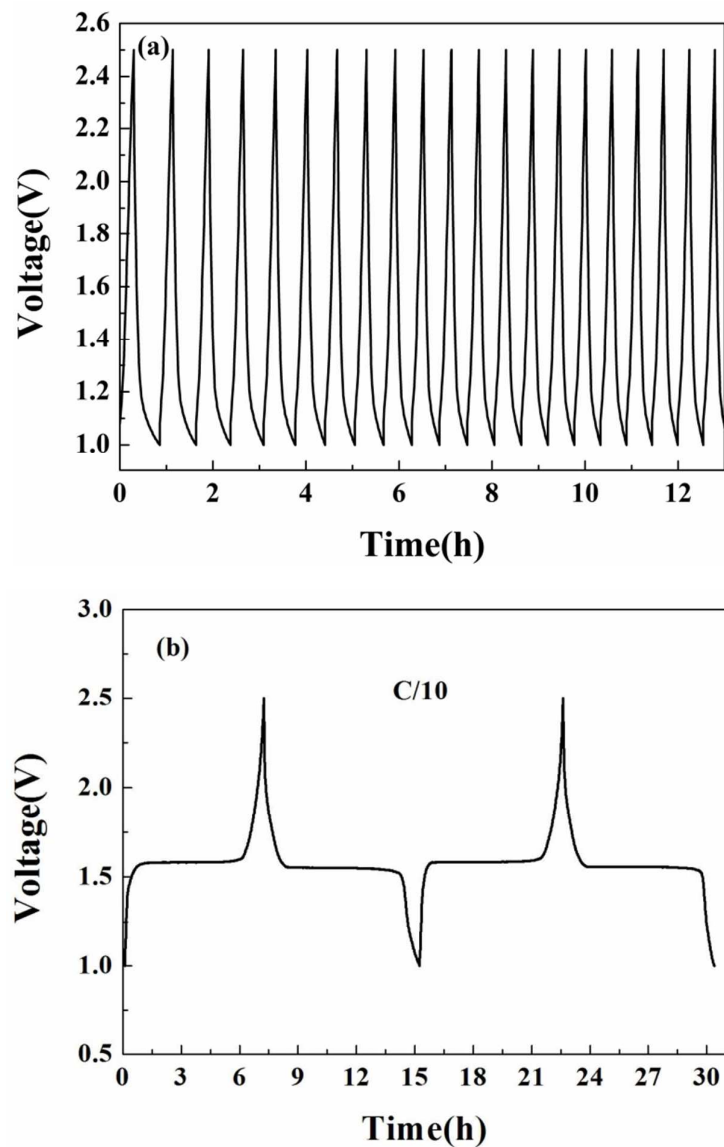

**Figure S3.** The galvanostatic charge/discharge curves of CNT/CNF film (a) and LTO/CNT/CNF film (b).

To evaluate the contribution of CNT to the capacity of the paper-electrode, the performances of the coin half-cells using CNT/CNF film and LTO/CNT/CNF film as electrode were compared. The CNT/CNF cycled with  $10 \mu\text{A}\cdot\text{mg}^{-1}$  current density and the LTO/CNT/CNF cycled at C/10 ( $17.5 \mu\text{A}\cdot\text{mg}^{-1}$ ) between 1.0 and 2.5V, respectively. As a result, the charge and discharge capacity of CNT/CNF is about  $3 \text{ mAh}\cdot\text{g}^{-1}$  ( $\sim 0.01 \text{ mAh}\cdot\text{cm}^{-2}$ ), which can be negligible when compared to that of LTO/CNT/CNF ( $160 \text{ mAh}\cdot\text{g}^{-1}$ ).

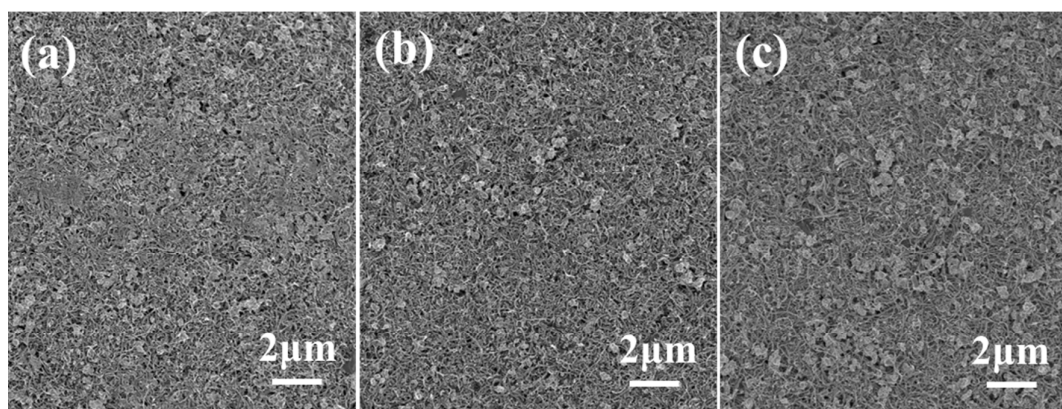

**Figure S4.** Low-magnification FESEM images of (a) LCC-50, (b) LCC-60 and (c) LCC-70 after cycling at 10 C for 500 cycles.
